# Supplementary material
Source: publisher figshare collection journal article supplement (https://brill.figshare.com/ndownloader/files/22476905)
Supplement: Supplementary file 1 [file 22476905]

**Taxonomy, ecology and distribution of the mosquitoes (Diptera:  
Culicidae) of the Dutch Leeward Islands, with a key to the adults  
and fourth instar larvae**

*Jordy G. van der Beek*

Naturalis Biodiversity Center, Leiden, the Netherlands

*jordy.vd.beek@gmail.com*

*Klaas-Douwe B. Dijkstra*

Naturalis Biodiversity Center, Leiden, the Netherlands

*Berry B. van der Hoorn*

Naturalis Biodiversity Center, Leiden, the Netherlands

*Sam P. Boerlijst*

Institute of Environmental Sciences, Leiden University, Leiden, the Netherlands

*Loes Busscher*

Naturalis Biodiversity Center, Leiden, the Netherlands

*Maud L. Kok*

Naturalis Biodiversity Center, Leiden, the Netherlands

*Marieta A.H. Braks*

Netherlands National Institute for Public Health and the Environment (RIVM),  
Bilthoven, the Netherlands

*Francis Schaffner*

Francis Schaffner Consultancy, Riehen, Switzerland

*Gerald J. Davelaar*

Ministry of Public Health, Social Development and Labour, Sint Maarten, Caribbean  
Netherlands

*Maria Henry*

Ministry of Public Health, Social Development and Labour, Sint Maarten, Caribbean  
Netherlands

*Koen Hulshof*

Netherlands National Institute for Public Health and the Environment (RIVM),  
Bilthoven, the Netherlands.

Public Health Department, Saba, Caribbean Netherlands

*Teresa E. Leslie*

Eastern Caribbean Public Health Foundation, Sint Eustatius, Caribbean Netherlands

*Maarten Schrama*

Naturalis Biodiversity Center, Leiden, the Netherlands

Institute of Environmental Sciences, Leiden University, Leiden, the Netherlands

**Supplementary material**

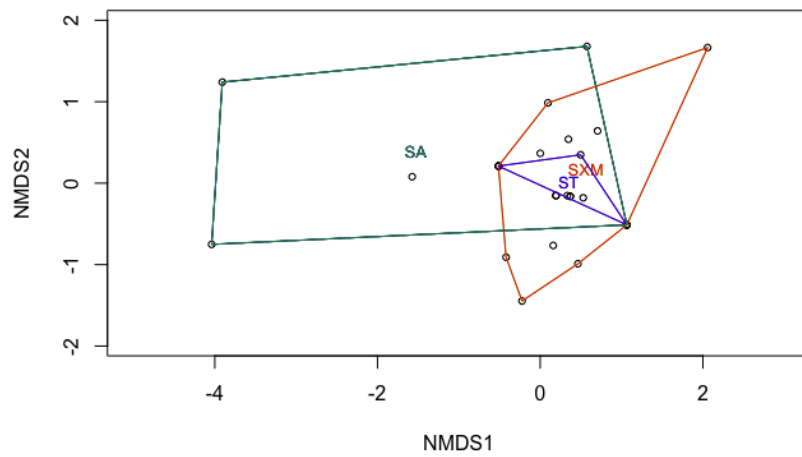

FIGURE S1 NMDS graph showing the differences in mosquito community composition between the three islands.

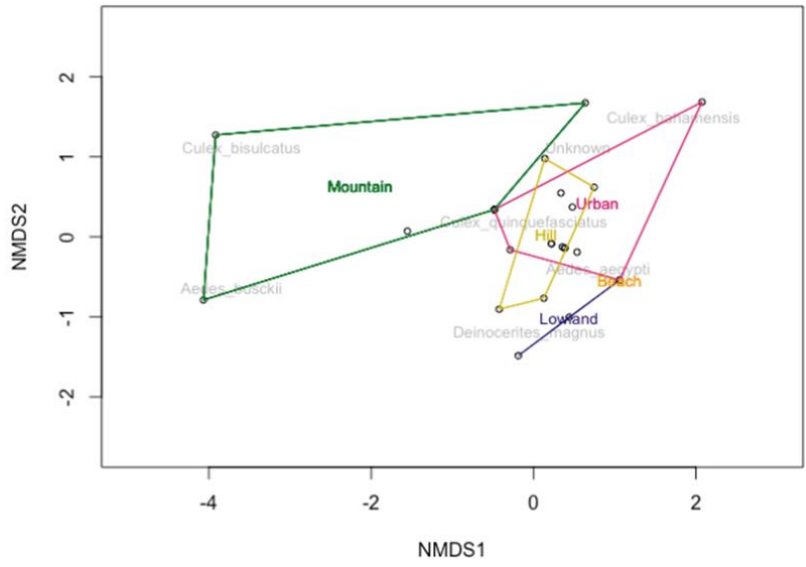

FIGURE S2 NMDS graph showing the differences in mosquito community composition between vegetation types on the different islands.
